# Supplementary material
Source: Springer Nature journal article supplement (https://www.springermedizin.de/resource/supplementary/13221_2010_5_MOESM6_ESM.pdf/9680802)

p>0.05 vs. control

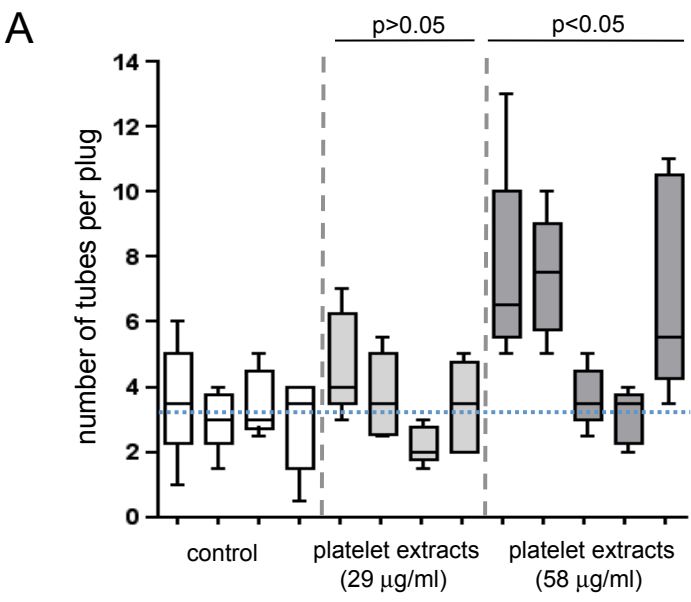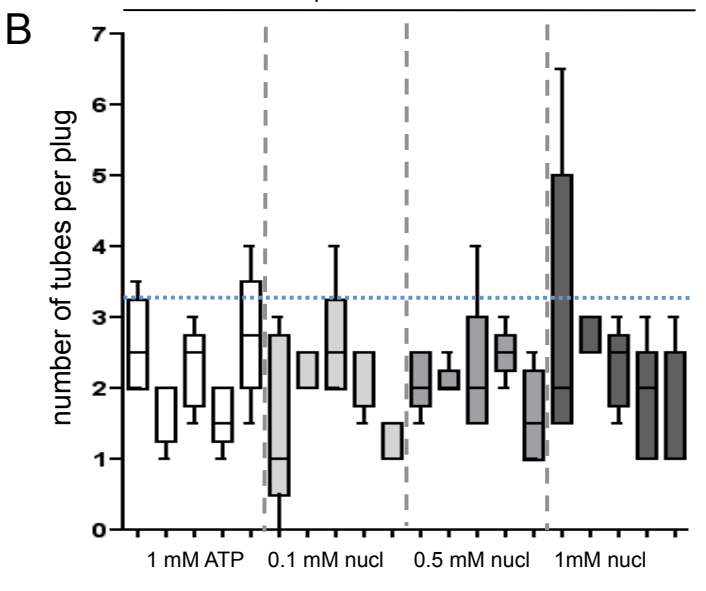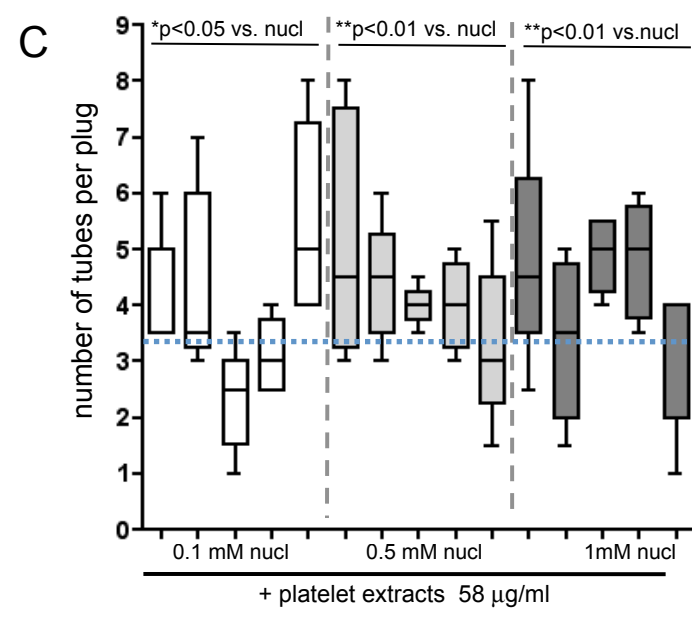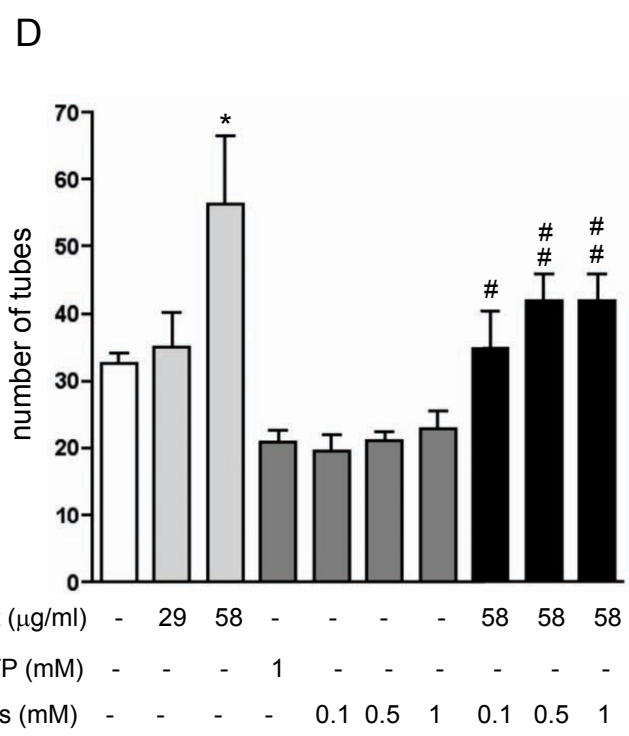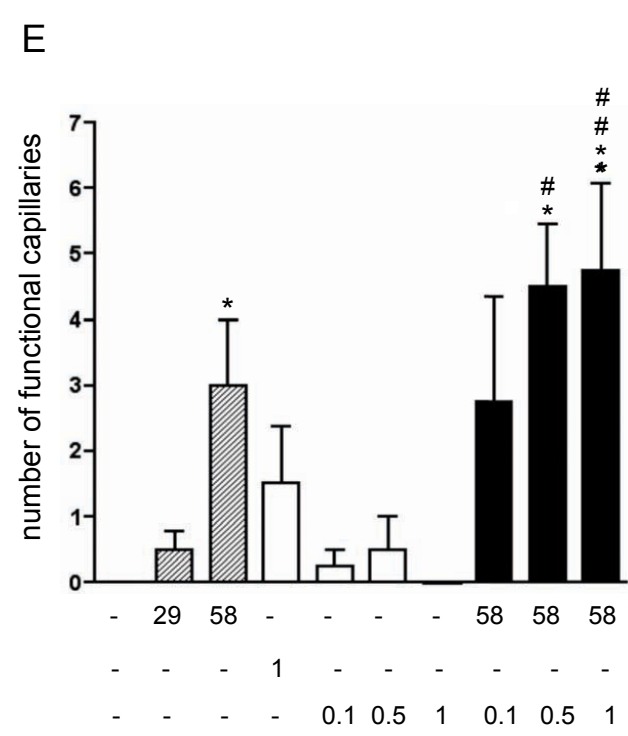

Supplement: MOESM6 [file 9680802]
